# Supplementary material for: The Tyrosyl-DNA Phosphodiesterase 1β (Tdp1β) Gene Discloses an Early Response to Abiotic Stresses
Source: Genes (Basel). 2017 Nov 3;8(11):305. doi: 10.3390/genes8110305 (PMC5704218; doi:10.3390/genes8110305)
Supplement: Supplementary file 1 [file genes-08-00305-s001.xlsx]

## Sheet: Supplementary Table S1
	Supplementary Table S1. Arabidopsis thaliana AtTdp1α, AtTdp1β and AtTOP1α, AtTOP1β gene expression profiles retrieved from the AtGenExpress microarray abiotic stress dataset. Data is presented as the mean of three replicates ± standard deviation.
	Stress	Timepoint (h)	AtTdp1α	AtTdp1β	AtTOP1α	AtTOP1β
	Cold	0	37.7 ± 3.35	5.93 ± 0.91	176.62 ± 9.34	139.07 ± 27.87
		0.5	39.76 ± 0.41	10.25 ± 2.76	191.73 ± 5.53	145.73 ± 13.97
		1	48.92 ± 1.45	6.64 ± 4.41	149.29 ± 33.78	137.68 ± 14.97
		3	39.09 ± 5.01	6.34 ± 0.37	156.49 ± 1.64	144.88 ± 6.9
		6	35.39 ± 2.49	4.17 ± 3.16	134.88 ± 4.3	157.16 ± 10.7
	Heat	0	37.7 ± 3.35	5.93 ± 0.91	176.62 ± 9.34	139.07 ± 27.87
		0.5	43.19 ± 6.07	3.42 ± 0.42	180.58 ± 5.9	148.51 ± 2.67
		1	36.39 ± 5.6	5.55 ± 1.49	179.88 ± 3.16	152.53 ± 5.12
		3	25.86 ± 0.77	4.05 ± 1.15	197.84 ± 1.88	160.25 ± 4.54
		6	56.24 ± 2.57	13.16 ± 1.51	206.13 ± 1.19	159.23 ± 2.99
	NaCl	0	37.7 ± 3.35	5.93 ± 0.91	176.62 ± 9.34	139.07 ± 27.87
		0.5	39.48 ± 3.59	8.21 ± 5.9	171.23 ± 5.78	170.61 ± 3.42
		1	44.36 ± 0.99	14.66 ± 1.08	182.13 ± 1.4	168.22 ± 5.79
		3	72.99 ± 3.63	7.71 ± 4.55	211.4 ± 11.87	178.92 ± 5.46
		6	58.02 ± 1.32	11.93 ± 0.25	205.83 ± 0.7	172.27 ± 4.82
	PEG	0	37.7 ± 3.35	5.93 ± 0.91	176.62 ± 9.34	139.07 ± 27.87
		0.5	34.28 ± 0.89	11.36 ± 1.48	152.67 ± 7.54	162.65 ± 8.63
		1	39.65 ± 2.87	10.08 ± 1.54	166.55 ± 1.68	176.91 ± 5.03
		3	49.84 ± 6.85	5.35 ± 1.72	170.26 ± 10.58	191.62 ± 1.93
		6	53.28 ± 0.06	7.13 ± 1.55	160.14 ± 3.28	216.93 ± 22.98
	UV-B	0	37.7 ± 3.35	5.93 ± 0.91	176.62 ± 9.34	139.07 ± 27.87
		0.5	38.76 ± 1.79	8.26 ± 2.09	165.7 ± 10.7	153.07 ± 2.13
		1	36.12 ± 3.94	9.68 ± 1.67	161.89 ± 14.15	147.38 ± 4.23
		3	24.72 ± 7.43	8.71 ± 1.63	160.13 ± 8.14	181.06 ± 0.74
		6	31.27 ± 4.04	11.94 ± 1.1	190.93 ± 15.82	195.06 ± 1.37
	CTRL/NT	0	37.7 ± 3.35	5.93 ± 0.91	176.62 ± 9.34	139.07 ± 27.87
		0.5	43.66 ± 1.83	5.48 ± 0.11	204.24 ± 10.68	149.99 ± 13.97
		1	47.62 ± 3.47	8.48 ± 6.18	194.37 ± 0.32	167.59 ± 2.59
		3	60.19 ± 2.53	12.2 ± 0.96	208.48 ± 17.63	154.44 ± 0.1
		6	44.98 ± 1.01	11.8 ± 0.84	175.6 ± 16.92	156.68 ± 0.29

## Sheet: Supplementary Table S2
	Supplementary Table S2. Medicago truncatula MtTdp1α, MtTdp1β, and MtTOP1α, MtTOP1β gene expresion profiles obtained from qRT-PCR analysis. Data is presented as the mean of three replicates ± standard deviation.
	Stress	Timepoint (h)	MtTdp1α	MtTdp1β	MtTOP1α	MtTOP1β
	Cold	0	0.0126 ± 0.0003	0.0049 ± 0.0032	0.194 ± 0.001	0.103 ± 0.004
		0.5	0.0002 ± 0.00002	0.0093 ± 0.0001	0.194 ± 0.061	0.130 ± 0.029
		1	0.0161 ± 0.0015	0.0222 ± 0.0040	0.303 ± 0.043	0.147 ± 0.021
		3	0.0031 ± 0.0004	0.0131 ± 0.0011	0.286 ± 0.011	0.221 ± 0.012
		6	0.0071 ± 0.0008	0.0216 ± 0.0007	0.276 ± 0.023	0.161 ± 0.010
	Heat	0	0.0126 ± 0.0003	0.0049 ± 0.0002	0.194 ± 0.001	0.103 ± 0.004
		0.5	0.000036 ± 0.000004	0.0019 ± 0.0003	0.083 ± 0.011	0.022 ± 0.001
		1	0.0019 ± 0.0001	0.0046 ± 0.0009	0.075 ± 0.004	0.015 ± 0.001
		3	0.0027 ± 0.0002	0.0042 ± 0.0007	0.156 ± 0.037	0.050 ± 0.001
		6	0.0018 ± 0.0001	0.0059 ± 0.0001	0.133 ± 0.015	0.036 ± 0.003
	NaCl	0	0.0126 ± 0.0003	0.0049 ± 0.0003	0.194 ± 0.001	0.103 ± 0.004
		0.5	0.0034 ± 0.0003	0.0202 ± 0.0023	0.225 ± 0.015	0.072 ± 0.010
		1	0.0112 ± 0.0022	0.0068 ± 0.0023	0.269 ± 0.018	0.092 ± 0.10
		3	0.000018 ± 0.000004	0.0111 ± 0.0023	0.091 ± 0.015	0.059 ± 0.015
		6	0.0014 ± 0.0005	0.0201 ± 0.001	0.116 ± 0.007	0.064 ± 0.018
	PEG	0	0.0127 ± 0.0003	0.0049 ± 0.0003	0.194 ± 0.001	0.103 ± 0.004
		0.5	0.0002 ± 0.00001	0.0126 ± 0.0010	0.264 ± 0.001	0.169 ± 0.005
		1	0.0096 ± 0.0015	0.0115 ± 0.0016	0.175 ± 0.016	0.121 ± 0.014
		3	0.0031 ± 0.0001	0.0071 ± 0.0010	0.406 ± 0.049	0.0171 ± 0.032
		6	0.0017 ± 0.0002	0.0241 ± 0.0042	0.489 ± 0.016	0.200 ± 0.056
	UV-B	0	0.0127 ± 0.0003	0.0049 ± 0.0002	0.194 ± 0.001	0.103 ± 0.004
		0.5	0.0002 ± 0.000007	0.0187 ± 0.0041	0.111 ± 0.022	0.065 ± 0.012
		1	0.0169 ± 0.0051	0.0132 ± 0.0036	0.374 ± 0.092	0.307 ± 0.070
		3	0.0178 ± 0.0006	0.0175 ± 0.0031	0.312 ± 0.017	0.248 ± 0.063
		6	0.0003 ± 0.00001	0.0061 ± 0.0001	0.482 ± 0.030	0.324 ± 0.055
	CTRL/NT	0	0.0126 ± 0.0003	0.0049 ± 0.003	0.194 ± 0.001	0.103 ± 0.004
		0.5	0.0002 ± 0.000008	0.0075 ± 0.0009	0.171 ± 0.03	0.077 ± 0.005
		1	0.0027 ± 0.0002	0.0140 ± 0.003	0.111 ± 0.003	0.059 ± 0.013
		3	0.0027 ± 0.0002	0.0162 ± 0.0032	0.262 ± 0.06	0.134 ± 0.004
		6	0.0021 ± 0.0006	0.0223 ± 0.0076	0.271 ± 0.01	0.155 ± 0.013

## Sheet: Supplementary Table S3
	Supplementary Table S3. Promoter cis-elements identified using the PlantCARE online tool. The function of each cis-element is specified, alongside with the frequency of presence in the promoter regions of AtTdp1α, AtTdp1β, MtTdp1α, and MtTdp1β.
	Cis-elements	Function	AtTdp1α	AtTdp1β	MtTdp1α	MtTdp1β
	4cl-CMA2b	light responsive element	0	2	0	0
	A-box	cis-acting regulatory element	1	1	1	0
	ABRE	abscisic acid response	3	4	6	0
	AC-I	lignin biosynthesis	1	1	0	0
	AC-II	lignin biosynthesis	1	1	0	0
	ACE	light response	2	2	0	0
	ARE	anaerobic induction	1	4	1	2
	Box 4	light response	1	4	2	3
	Box I	light response	1	2	3	4
	Box II	light response	1	0	0	0
	Box-W1	fungal elicitor responsive element	0	1	1	0
	CAAT-box	enhancer region	24	19	26	18
	CATT-motif	light responsive element	0	1	0	0
	CCGTCC-box	meristem specific activation	1	1	1	0
	ERE	ethylene-responsive element	1	1	0	1
	G-Box	light responsiveness	4	5	1	1
	G-box	light responsiveness	4	7	8	1
	GARE-motif	gibberellin-responsive element	0	5	0	0
	GT1-motif	light responsive element	0	4	1	0
	HD-Zip 1	differentiation of the palisade mesophyll cells	0	1	0	0
	HD-Zip 2	control of leaf morphology development	0	1	0	0
	HSE	heat stress responsiveness	2	1	2	1
	L-box	light responsive element	0	1	0	0
	MRE	light responsive element	0	1	0	0
	Skn-1_motif	endosperm expression	3	2	2	1
	Sp1	light responsive element	1	1	2	0
	TATA-box	transcription start	26	19	22	31
	TC-rich repeats	defense and stress responsiveness	6	2	2	4
	TCCACCT-motif		0	1	0	0
	TCT-motif	light responsive element	1	1	0	1
	TGA-element	auxin-responsive element	0	1	1	1
	W box	binding site for WRKY transciption factors	0	1	1	0
	WUN-motif	wound-responsive element	0	1	0	1
	3-AF1 binding site	light responsive element	0	0	1	0
	AT-rich element	binding site of AT-rich DNA binding protein (ATBP-1)	0	0	1	0
	AuxRR-core	auxin responsiveness	0	0	1	0
	CAT-box	meristem expression	0	0	1	0
	CGTCA-motif	MeJA-responsiveness	1	0	2	0
	GATA-motif	light responsive element	0	0	1	0
	GTGGC-motif	light responsive element	0	0	1	0
	I-box	light responsive element	0	0	1	0
	LTR	low-temperature responsiveness	0	0	1	0
	MBS	drought-inducibility	1	0	3	0
	OBP-1 site	cis-acting regulatory element	0	0	1	0
	TCA-element	salicylic acid responsiveness	2	0	4	1
	TGACG-motif	MeJA-responsiveness	1	0	2	0
	circadian	circadian control	1	0	2	2
	AE-box	light response	2	0	0	0
	CE3	ABA and VP1 responsiveness	1	0	0	0
	GA-motif	light responsive element	1	0	0	0
	GCN4_motif	endosperm expression	1	0	0	1
	Gap-box	light responsive element	1	0	0	0
	L-box	light responsive element	1	0	0	0
	AGAA-motif		0	0	0	2
	AT1-motif	light responsive module	0	0	0	1
	ATCT-motif	light responsiveness	0	0	0	1
	GAG-motif	light responsive element	0	0	0	1
	P-box	gibberellin-responsive element	0	0	0	1
	chs-CMA2a	light responsive element	0	0	0	1
